# Supplementary material for: HPV transcript expression affects cervical cancer response to chemoradiation
Source: JCI journal article supplement (doi:10.1172/jci.insight.138734), 2021-07-13
Supplement: sd2 [file 2]

HPV 16 E6 and E6\* vector sequences:

HPV 16 E6 ORF

GCGATCGCCATGCACCAGAAACGAACCGCTATGTTTCAGGATCCTCAGGAGAGACC  
TCGCAAGCTCCCTCAGCTGTGCACTGAGCTCCAGACGACCATTCACGATATCATCCT  
TGAGTGTGTGTATTGTAAACAGCAGCTGCTGAGACGGGAAGTGTACGATTTTCGCTTT  
CAGGGACCTCTGCATAGTCTACAGGGACGGAAACCCTTACGCCGTGTGCGACAAAT  
GTCTGAAATTCTACTCCAAAATCTCTGAATATAGGCACTATTGTTACTCACTTTATGG  
AACAAACCCTGGAGCAGCAATATAATAAGCCTCTTTGCGACCTGCTGATTTCGGTGCAT  
CAATTGCCAGAAACCGCTCTGTCCAGAGGAGAAGCAGAGGCACCTGGACAAAAAAC  
AGAGGTTTTCATAATATACGGGGGCGGTGGACAGGCAGGTGTATGAGCTGCTGTTCGG  
AGTAGTCGAACAAGAAGGGAGACCCAGCTGACGCGTACGCGGCCGCTCGAGCAGA  
AACTCATCTCAGAAGAGGATCTGGCAGCAAATGATATCCTGGATTACAAGGATGAC  
GACGATAAG

HPV 16 E6\* ORF (c.151 G>T)

GCGATCGCCATGCACCAGAAACGAACCGCTATGTTTCAGGATCCTCAGGAGAGACC  
TCGCAAGCTCCCTCAGCTGTGCACTGAGCTCCAGACGACCATTCACGATATCATCCT  
TGAGTGTGTGTATTGTAAACAGCAGCTGCTGAGACGGGAAGTGTACTAATTCGCTTT  
CAGGGACCTCTGCATAGTCTACAGGGACGGAAACCCTTACGCCGTGTGCGACAAAT  
GTCTGAAATTCTACTCCAAAATCTCTGAATATAGGCACTATTGTTACTCACTTTATGG  
AACAAACCCTGGAGCAGCAATATAATAAGCCTCTTTGCGACCTGCTGATTTCGGTGCAT  
CAATTGCCAGAAACCGCTCTGTCCAGAGGAGAAGCAGAGGCACCTGGACAAAAAAC  
AGAGGTTTTCATAATATACGGGGGCGGTGGACAGGCAGGTGTATGAGCTGCTGTTCGG  
AGTAGTCGAACAAGAAGGGAGACCCAGCTGACGCGTACGCGGCCGCTCGAGCAGA  
AACTCATCTCAGAAGAGGATCTGGCAGCAAATGATATCCTGGATTACAAGGATGAC  
GACGATAAG
